# Supplementary material for: Porous carbon-confined CoxSy nanoparticles derived from ZIF-67 for boosting lithium-ion storage
Source: Royal Society of Chemistry journal article supplement (doi:10.1039/d1ra08581f), 2022-01-01
Supplement: d1ra08581f1.pdf [file d1ra08581f1.pdf]

## *Supporting Information*

### **Porous Carbon Confined $\text{Co}_x\text{S}_y$ Nanoparticles Derived from ZIF-67 for Boosting Lithium-Ion Storage**

Xiao Su <sup>a</sup>, Wen Li <sup>a,\*</sup>, Haining Sun <sup>b</sup>, Jian Wang <sup>b,\*</sup>, Sisi Hu <sup>a</sup>, Fei Yuan <sup>a</sup>, Di Zhang <sup>a</sup>, Bo Wang <sup>a,\*</sup>

<sup>a</sup> Hebei Key Laboratory of Flexible Functional Materials, School of Materials Science and Engineering, Hebei University of Science and Technology, Shijiazhuang 050000, China

<sup>b</sup> Innovation Center for Hebei Intelligent Grid Distribution Technology, Shijiazhuang Kelin Electric Co., Ltd, Shijiazhuang 050000, China

\*Corresponding authors.

*E-mail addresses:* liwen\_cc@yeah.net (W. L), wangjian0534@sina.com (J. W),

wangbo1996@gmail.com (B. W).

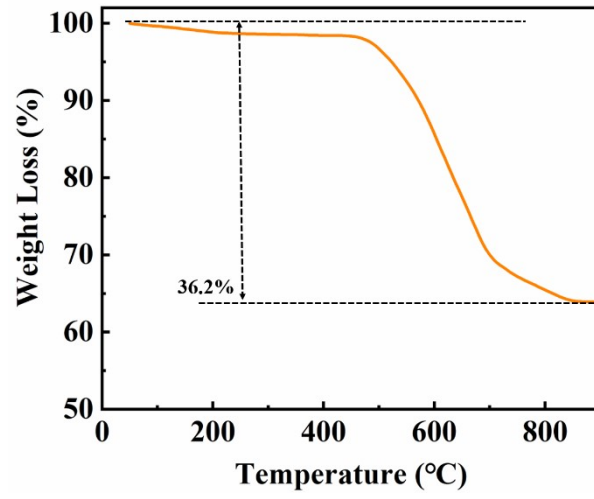

**Fig. S1.** TGA curve of  $\text{Co}_x\text{S}_y$  powder under nitrogen atmosphere.

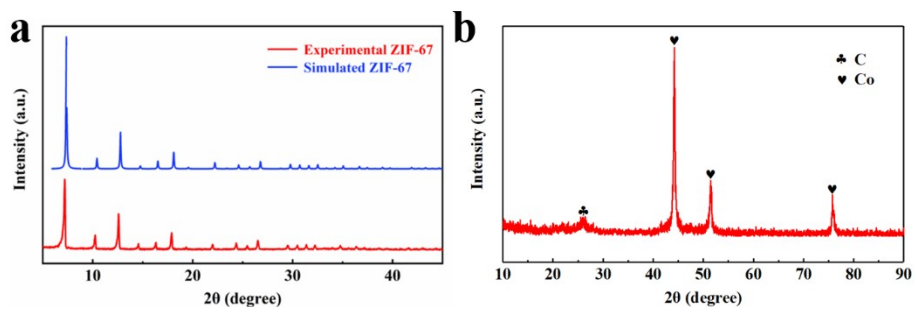

**Fig. S2.** XRD patterns of ZIF-67 (a) and ZIF-67(600) (b).

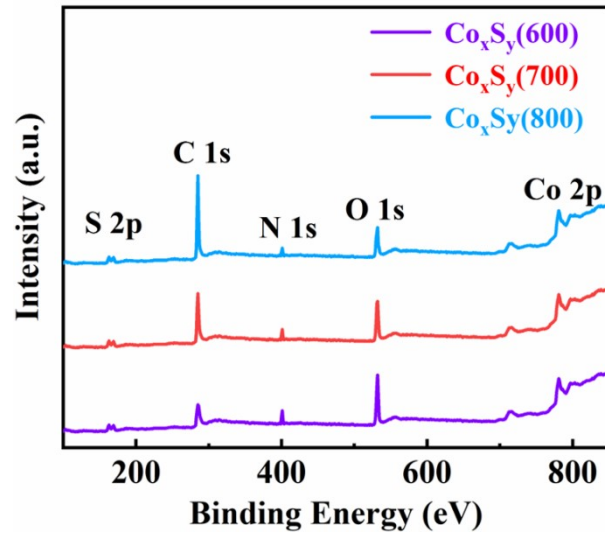

**Fig. S3.** XPS survey spectrum of  $\text{Co}_x\text{S}_y(600)$ ,  $\text{Co}_x\text{S}_y(700)$ , and  $\text{Co}_x\text{S}_y(800)$ .

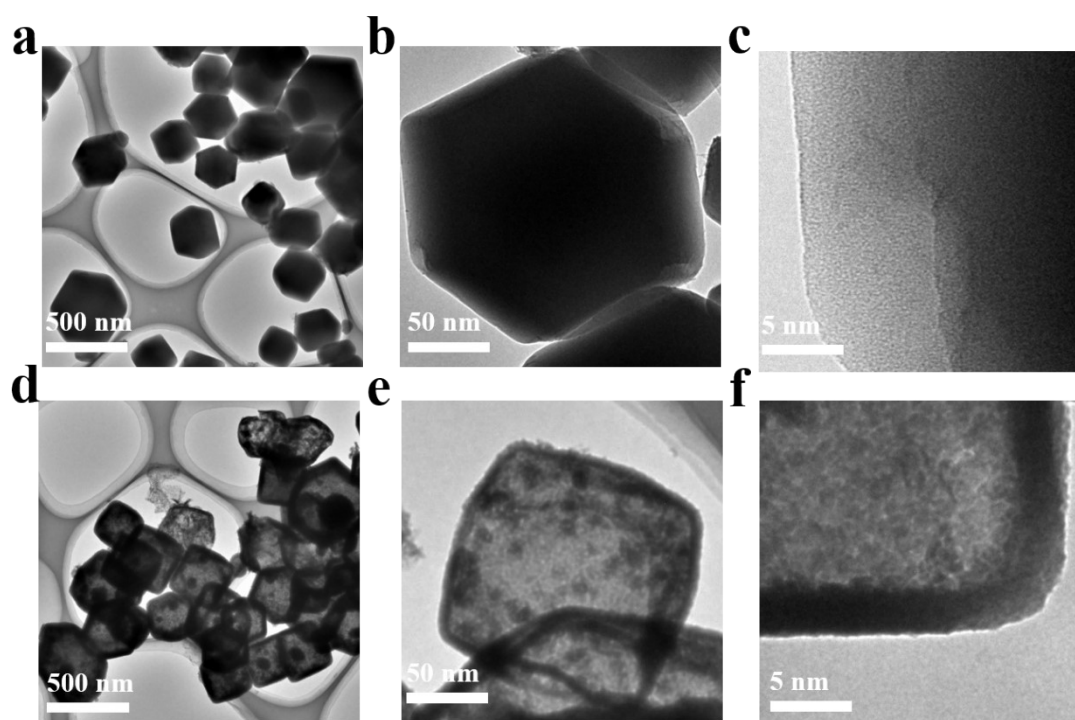

**Fig. S4.** TEM images of ZIF-67 (a-c) and hollow  $\text{Co}_x\text{S}_y$  (d-f).

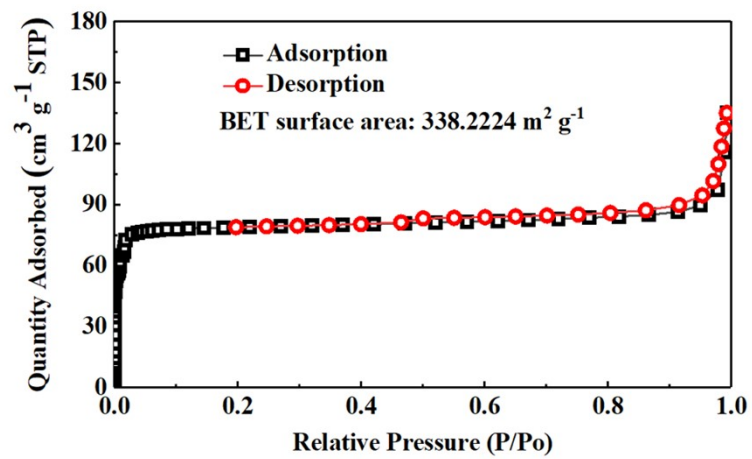

Fig. S5. N<sub>2</sub> adsorption-desorption isotherms of Co<sub>x</sub>S<sub>y</sub>(700).

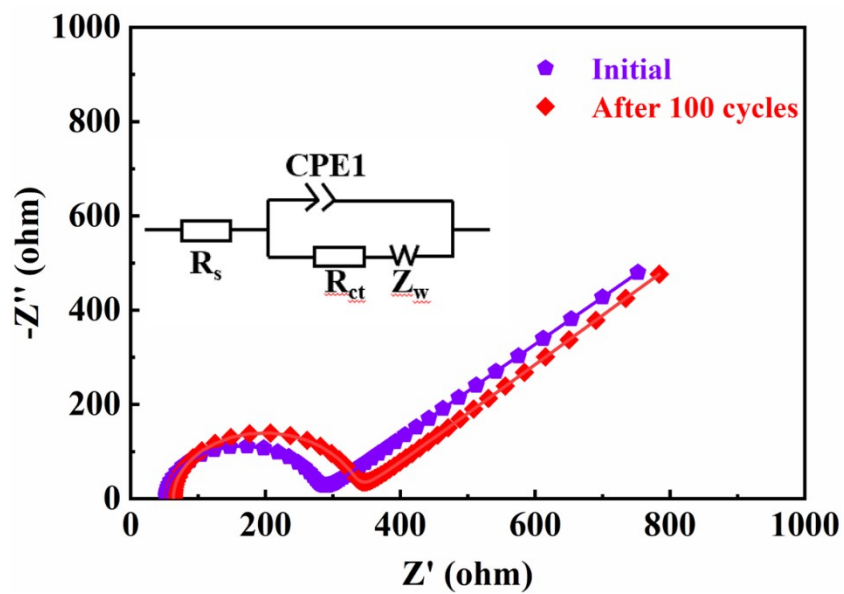

**Fig. S6.** Electrochemical impedance spectroscopy (EIS) of  $\text{Co}_x\text{S}_y(700)$  at  $1 \text{ A g}^{-1}$  before and after 100 cycles.

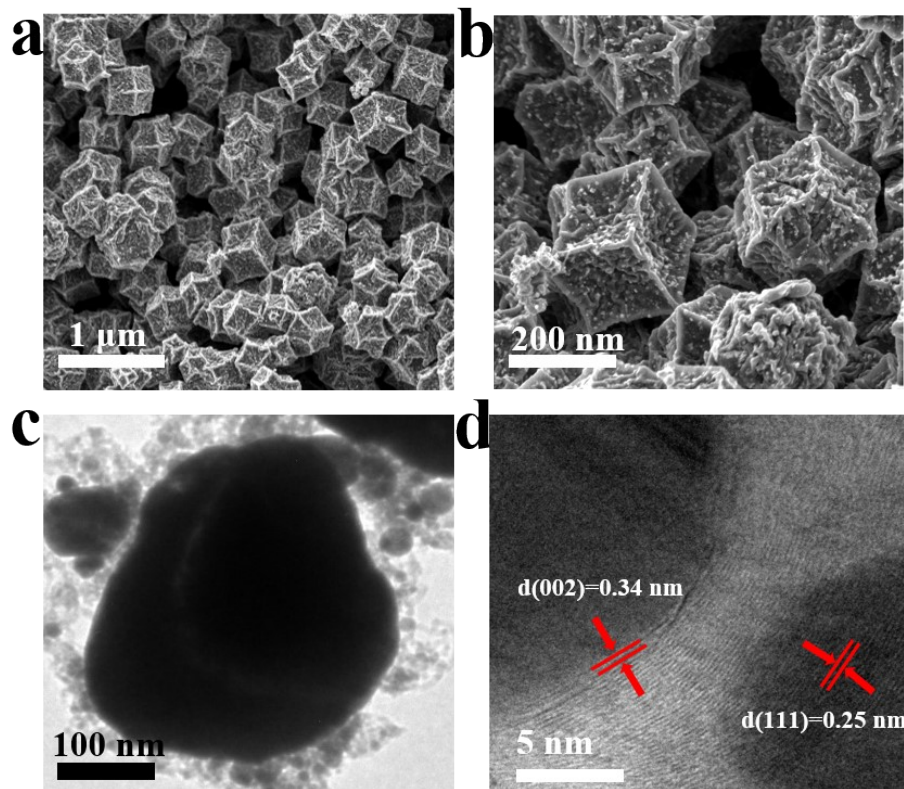

**Fig. S7.** (a, b) SEM images and (c, d) TEM images of ZIF-67(600).



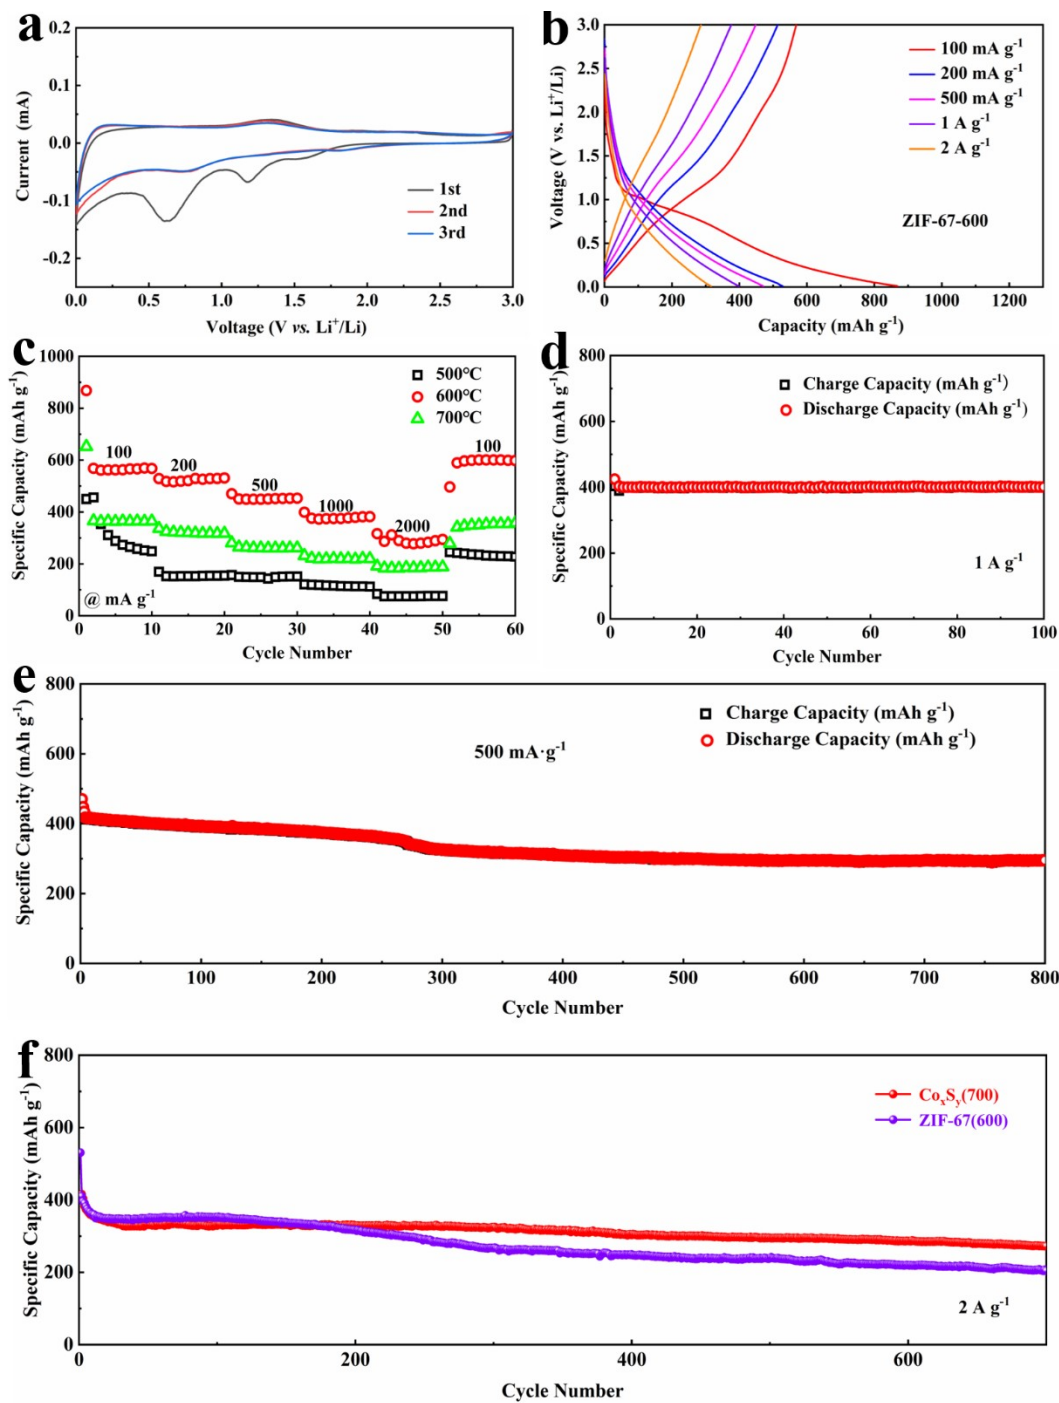

**Fig. S8.** CV curve (a) and galvanostatic charge-discharge curves at different rates (b) of ZIF-67(600). Rate performance (c) of ZIF-67(*m*); cycling stability at 1 A g<sup>-1</sup> (d) and 500 mA g<sup>-1</sup> (e) of ZIF-67(600). (f) The cycling performance comparison of ZIF-67(600) and Co<sub>x</sub>S<sub>y</sub>(700) at 2 A g<sup>-1</sup> for 700 cycles.

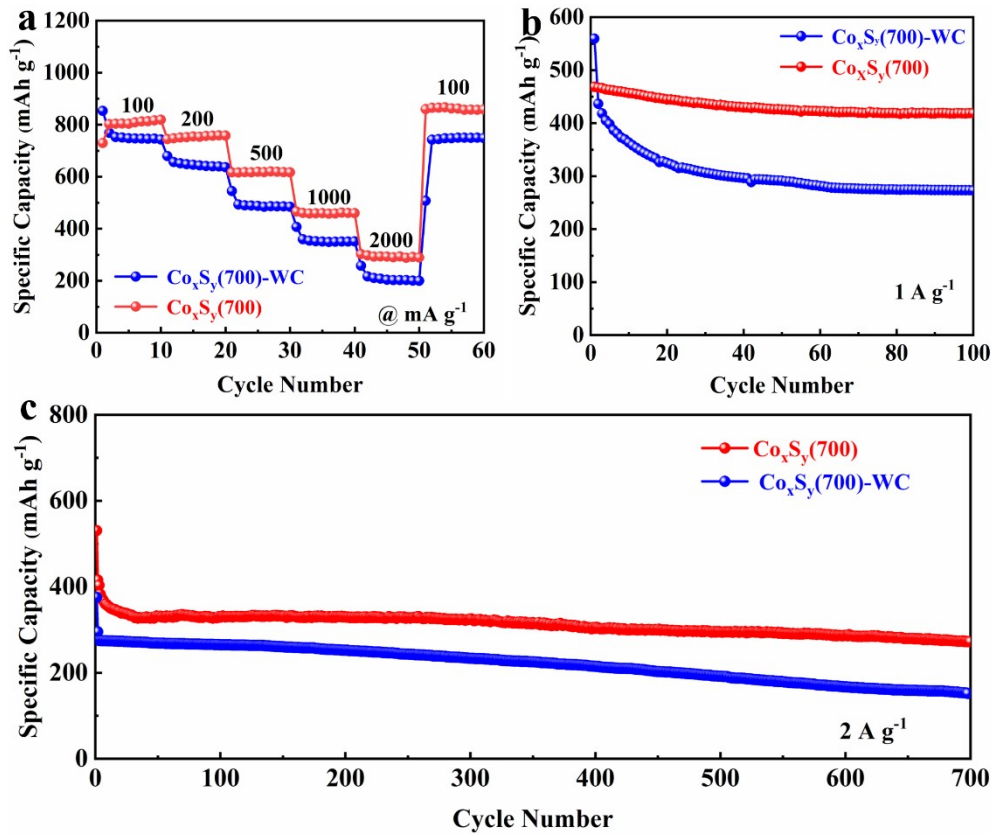

**Fig. S9.** The comparison of rate (a), cycle (b), and long cycle (c) for Co<sub>x</sub>S<sub>y</sub>(700) and Co<sub>x</sub>S<sub>y</sub>(700)-WC.
